# Supplementary material for: Data-independent Acquisition Improves Quantitative Cross-linking Mass Spectrometry
Source: PubMed Central journal article supplement (PMC6442367; doi:10.1074/mcp.tir118.001276), 2019-01-16
Supplement: 142541_0_supp_249977_pjmkyw.pdf [file 142541_0_supp_249977_pjmkyw.pdf]

# Data-independent acquisition improves quantitative cross-linking mass spectrometry

Fränze Müller<sup>1</sup>, Lars Kolbowski<sup>1,2</sup>, Oliver M. Bernhardt<sup>3</sup>, Lukas Reiter<sup>3</sup>, Juri Rappsilber<sup>1,2,\*</sup>

<sup>1</sup> Bioanalytics, Institute of Biotechnology, Technische Universität Berlin, 13355 Berlin, Germany

<sup>2</sup> Wellcome Centre for Cell Biology, School of Biological Sciences, University of Edinburgh, Edinburgh EH9 3BF, Scotland, United Kingdom

<sup>3</sup> Biognosys, 8952 Zürich-Schlieren, Switzerland

## Supplemental Material:

**Supplemental Figure S1** – Performance comparison of Spectronaut 11 and 12 for automated and manual curation of the 7 protein mix dilution series with and without *E. coli* as background matrix.

**Supplemental Figure S2** – Comparison of Top3 approach vs. summing up all cross-linked peptides for residue pair level in a quantitative cross-linking mass spectrometry analysis.

**XiFDR\_PSMfile\_7PMix\_BS3\_5%linklevel.xls** - List of all peptide sequences identified, Precursor charge, m/z, all modifications observed, sites of modification within each peptide, peptide identification scores, linkage side and linkage position after FDR estimation (5%link level) for the pure dilution series of the 7 protein mix cross-linked with BS<sup>3</sup>.

**XiFDR\_PSMfile\_7PMix\_BS3\_ecolibg\_5%linklevel.xls** - List of all peptide sequences identified, Precursor charge, m/z, all modifications observed, sites of modification within each peptide, peptide identification scores, linkage side and linkage position after FDR estimation (5%link level) for the dilution series of the 7 protein mix cross-linked with BS<sup>3</sup> using *E.coli* as background matrix.

**XiFDR\_PSMfile\_HSA\_BS3\_5%linklevel.xls** - List of all peptide sequences identified, Precursor charge, m/z, all modifications observed, sites of modification within each peptide, peptide identification scores, linkage side and linkage position after FDR estimation (5%link level) for the dilution series of human serum albumin (HSA) cross-linked with BS<sup>3</sup>.

**XiDIALib\_7PMix\_BS3\_ecolibg\_nCL10\_nLin10\_lossyFalse.xls** – Spectral library for the 7 protein mix dilution series using *E. coli* as background matrix.

**XiDIALib\_7PMix\_BS3\_nCL10\_nLin10\_lossyFalse.xls** - Spectral library for the pure dilution series of the 7 protein mix

**HSA\_BS3\_DDA\_dilution.xls** - Spectral library for the HSA DDA dilution series.

**E.coli\_background\_library.xls** – Background spectral library of *E. coli* lysate.

**Spectronaut\_output\_7PMix\_BS3\_SCX\_ingel.xls** – Quantitation report file from Spectronaut for the pure dilution series of the 7 protein mix

**Spectronaut\_output\_7PMix\_BS3\_SCX\_ingel\_ecolibg.xls** - Quantitation report file from Spectronaut for the dilution series of the 7 protein mix using *E. coli* as background matrix.

**7PMix\_BS3\_SCX\_E.coli\_bg\_lib\_withl\_Report.xls** - Quantitation report file from

Spectronaut for the dilution series of the 7 protein mix using *E. coli* as background matrix and additional *E. coli* background library with interference correction option.

**HSA\_BS3\_DDA\_dilution\_series\_Skyline.xls** - Quantitation report file from Skyline for the dilution series of the HSA cross-linked with BS<sup>3</sup> (DDA data).

**Figure S1**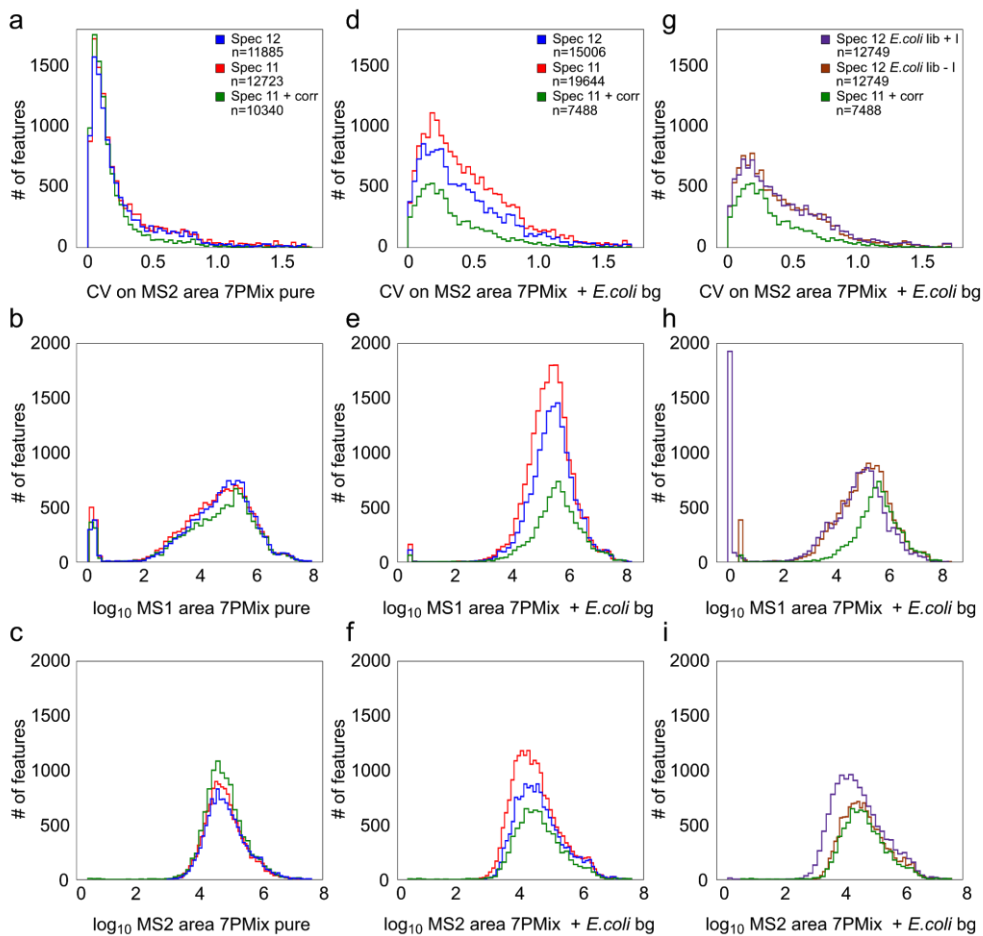

**Fig. S1:** Performance comparison between Spectronaut 11 and 12 for a cross-linking/mass spectrometry analysis. a: histogram of CV values for the pure dilution series (blue: automated QCLMS analysis in Spectronaut 12, red: automated QCLMS analysis in Spectronaut 11, green: manual corrected dataset in Spectronaut 11). b: histogram of  $\log_{10}$  MS1 peak areas for cross-linked features in the pure dilution series (blue: automated QCLMS analysis in Spectronaut 12, red: automated QCLMS analysis in Spectronaut 11, green: manual corrected dataset in Spectronaut 11). c: histogram of  $\log_{10}$  MS2 peak areas for cross-linked features in the pure dilution series (blue: automated QCLMS analysis in Spectronaut 12, red: automated QCLMS analysis in Spectronaut 11, green: manual corrected dataset in Spectronaut 11). d: histogram of CV values for the dilution series using *E. coli* as background (blue: automated QCLMS analysis in Spectronaut 12, red: automated QCLMS analysis in Spectronaut 11, green: manual corrected dataset in Spectronaut 11). e: histogram of  $\log_{10}$  MS1 peak areas for cross-linked features in the dilution series using *E. coli* as background (blue: automated QCLMS analysis in Spectronaut 12, red: automated QCLMS analysis in Spectronaut 11, green: manual corrected dataset in Spectronaut 11). f: histogram of  $\log_{10}$  MS2 peak areas for cross-linked features in the dilution series using *E. coli* as background (blue: automated QCLMS analysis in Spectronaut 12, red: automated QCLMS analysis in Spectronaut 11, green: manual corrected dataset in Spectronaut 11). g: histogram of CV values for the dilution series using *E. coli* as background (violet: automated QCLMS analysis in Spectronaut 12 using interference correction and an *E. coli* background library, brown: automated QCLMS analysis in Spectronaut 12 without interference correction using an *E. coli* background library, green: manual corrected dataset in Spectronaut 11). h: histogram of  $\log_{10}$  MS1 peak areas for cross-linked features in the dilution series using *E. coli* as background (violet: automated QCLMS analysis in Spectronaut 12 using interference correction and an *E. coli* background library, brown: automated QCLMS analysis in Spectronaut 12 without interference correction using an *E. coli* background library, green: manual corrected dataset in Spectronaut 11). i: histogram of  $\log_{10}$  MS2 peak areas for cross-linked features in the dilution series using *E. coli* as background (violet: automated QCLMS analysis in Spectronaut 12 using interference correction and an *E. coli* background library, brown: automated QCLMS analysis in Spectronaut 12 without interference correction using an *E. coli* background library, green: manual corrected dataset in Spectronaut 11). Note that the number of features decreases from Spectronaut 11 to Spectronaut 12 due to improved internal FDR estimation. Less features are passing the q-value filtering in Spectronaut 12. The number of features quantified decreases for the corrected dataset due to manual curation and excluding low quality features from the analysis.

**Figure S2**

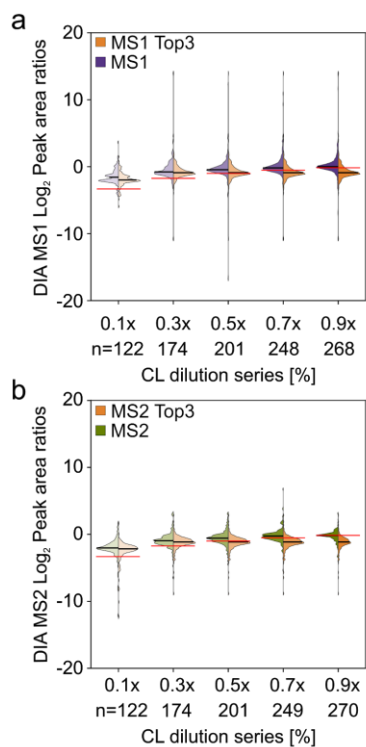

**Fig. S2:** Comparison of Top3 approach vs. summing up all cross-linked peptides for residue pair level in a quantitative cross-linking mass spectrometry analysis. a: Log<sub>2</sub> peak area ratios of each dilution step, showing precision of mixing (black line) vs expected ratios (red line) on MS1 without Top3 approach (purple) and using Top3 (orange). b: Log<sub>2</sub> peak area ratios of each dilution step, showing precision of mixing (black line) vs expected ratios (red line) on MS2 without Top3 approach (green) and using Top3 (orange).
